# Supplementary material
Source: Springer Nature journal article supplement (https://www.springermedizin.de/resource/supplementary/13054_2013_2882_MOESM2_ESM.pdf/9714112)

**A****All patients**  
(*N* = 822)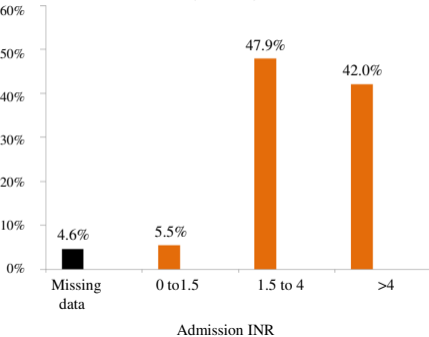**B****ICH patients**  
(*N* = 262)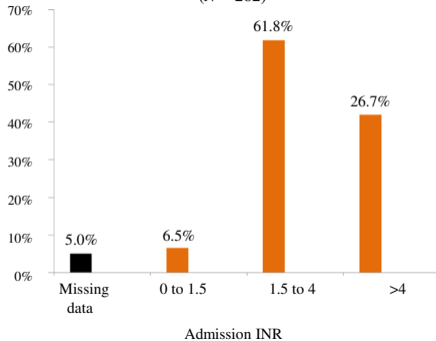

Supplement: MOESM2 [file 9714112]
